# Supplementary material for: Loneliness amongst Low-Socioeconomic Status Elderly Singaporeans and its Association with Perceptions of the Neighbourhood Environment
Source: PubMed Central journal article supplement (PMC6466029; doi:10.3390/ijerph16060967), 2019-03-18
Supplement: ijerph-16-00967-s001.pdf [file ijerph-16-00967-s001.pdf]

**Supplementary Table S1:** Principal components analysis of the 17-item modified Neighbourhood Environment Walkability Scale Abbreviated (NEWS-A).

| Original Subscales of the NEWS                                                     | Principal Components derived from Factor Analysis                       |                                                                        |
|------------------------------------------------------------------------------------|-------------------------------------------------------------------------|------------------------------------------------------------------------|
|                                                                                    | Perceptions of Neighbourhood Safety and Convenience (45.2% of Variance) | Perceptions of Neighbourhood Physical Environment (10.60% of Variance) |
| <b>Crime safety (7 items)</b>                                                      |                                                                         |                                                                        |
| Presence of litter/trash                                                           | 0.345                                                                   | 0.676                                                                  |
| Lighting/signage in neighbourhood streets                                          | 0.303                                                                   | 0.616                                                                  |
| Presence of pedestrians/people on the street                                       | 0.341                                                                   | 0.637                                                                  |
| Observed interaction (e.g., conversation) between pedestrians on the street        | 0.678                                                                   | -0.099                                                                 |
| Perceived crime rate in neighbourhood                                              | 0.728                                                                   | -0.112                                                                 |
| Perceived safety when walking around neighbourhood by day                          | 0.818                                                                   | -0.134                                                                 |
| Perceived safety when walking around neighbourhood by night                        | 0.730                                                                   | -0.108                                                                 |
| <b>Land use access (2 items)</b>                                                   |                                                                         |                                                                        |
| Physical barriers in neighbourhood (e.g., uneven ground, steps)                    | 0.298                                                                   | 0.663                                                                  |
| Easy to walk to bus & train stations                                               | 0.795                                                                   | -0.043                                                                 |
| <b>Land use diversity (8 items) Convenience to access the following amenities:</b> |                                                                         |                                                                        |
| Grocery store (provision shop, wet market, supermarket)                            | 0.857                                                                   | -0.131                                                                 |
| Eating place (hawker centre, coffee shop)                                          | 0.729                                                                   | -0.063                                                                 |
| Financial services (bank/ATM/post office)                                          | 0.761                                                                   | 0.031                                                                  |
| Religious institution (e.g., temples, churches)                                    | 0.706                                                                   | -0.071                                                                 |
| Dispensaries (pharmacies, medicinal shops)                                         | 0.845                                                                   | -0.128                                                                 |
| Medical services (clinics/dentals)                                                 | 0.863                                                                   | -0.111                                                                 |
| Community activity centre (e.g., community club, senior activity centre)           | 0.787                                                                   | -0.097                                                                 |
| Recreational areas (e.g., park, swimming pools, gym or fitness facility)           | -0.080                                                                  | -0.030                                                                 |

Factor analysis of the 17 NEWS items produced 2 principal components, summarised as “*perceptions of neighbourhood safety and convenience*” and “*perceptions of neighbourhood physical environment*”. Most of the subscales related to perceived neighbourhood safety (e.g., perceived crime rate in neighbourhood, perceived safety when walking around) and perceived neighbourhood convenience (availability of amenities, such as convenient access to shops, eating places, medical services, and recreational areas) loaded onto the first principal component, while subscales related to the physical environment (e.g., presence of litter, lighting/signage, physical barriers such as uneven ground or steps) loaded onto the second principal component.
